# 1 Fine mapping of goat polledness variant in six Chinese native 2 breeds

3 Yong Li<sup>1\*</sup>, Tao Chen<sup>1\*</sup>, Man-Man Yang<sup>1\*</sup>, Hu Han<sup>1\*</sup> Dan jiang<sup>2</sup>, Qiang  
4 Wei<sup>1</sup>, Xing-Ju Zhang<sup>1</sup>, Yan Ao<sup>3</sup>, Qingfeng Zhang<sup>4</sup>, Ze-Pu Miao<sup>1</sup>, Ran  
5 Wang<sup>1</sup>, Yuan-Lun Li<sup>5</sup>, Sheng-Yu Chao<sup>6</sup>, Lin Li<sup>1</sup>, Ting-Ting Zhang<sup>1</sup>, Ming  
6 Fang<sup>2#</sup>

7 1. Shenzhen Engineering Laboratory for Genomics-Assisted Animal Breeding, BGI Institute of  
8 Applied Agriculture, BGI-Shenzhen, Shenzhen, 518120, PR China.

9 2. Key Laboratory of Healthy Mariculture for the East China Sea, Ministry of Agriculture and  
10 Rural Affairs, Fisheries College, Jimei University, Xiamen, 361021, Fujian province, PR  
11 China

12 3. Key Laboratory of Agricultural Animal Genetics, Breeding, and Reproduction of the Ministry  
13 of Education, The Cooperative Innovation Center for Sustainable Pig Production, Huazhong  
14 Agricultural University, Wuhan 430070, PR China

15 4. The Enterprises Key Laboratory of Tianjin Mutton Sheep Genetics and breeding, Tianjin  
16 Aoqun Animal Husbandry Pty.Ltd, Tianjin, 301607, PR China

17 5. Livestock Industry Development Center of Wushan County, Chongqing, 404799, PR China.

18 6. Haixi Agricultural Technology Extension Service Center, Haixi Mongol and Tibetan  
19 Autonomous Prefecture, Qinghai province, 817099, PR China

20 Corresponding author: DR. Ming Fang, [fangming618@126.com](mailto:fangming618@126.com)

21

## 22 **Abstract**

23 **Background:** The genetic mechanism of goat polledness has been studied for  
24 decades, but identifying causative variants and functional genes remains challenging.

25 **Results:** Using a genome-wide association study (GWAS), we identified a significant  
26 striking locus for polledness in two different goat breeds. To reduce the linkage  
27 disequilibrium among variants for localizing causative variants in the finer region, we  
28 sequenced 79 goats from six Chinese native breeds (Jining Gray, Matou, Guizhou  
29 black, Yunnan black bone, Chaidamu, and Ujumqin) and identified 483.5 kb CNV  
30 (150,334,567-150,818,099) translocated into the previously identified 11.7 kb polled  
31 intersex syndrome region, which was consistent with previous research using intersex

32 goat populations. Within the 483.5 kb CNV, a ~322 bp horn-specific element, similar  
33 to the superfamily of tRNA-derived families of SINEs, located at the first intron of  
34 the *ERG* gene was identified. The results of the GO enrichment analysis showed that  
35 the Horn-SINE element-associated genes were involved in both nervous system and  
36 head development. Finally, we used RNA sequencing to investigate gene expression  
37 profiles in the horn bud and skin tissues of horned and polled goats. We identified  
38 1077 and 1222 differentially expressed genes between the horn bud and skin tissue in  
39 polled and horned goats, respectively. We also identified 367 differentially expressed  
40 genes in horn buds between polled and horned animals, and found that the two CNV-  
41 related genes, *ERG* and *FOXL2*, were upregulated in the horn bud of polled goats.  
42 Gene functional enrichment analysis demonstrated that the downregulated genes in  
43 the horn bud of polled goats were enriched in skeletal system development, whereas  
44 the upregulated genes were significantly overexpressed in muscle tissue development.

45

46 **Conclusions:** Broadly, this study describes a novel structural variant responsible for  
47 polledness/intersex traits and contributes to the discovery of molecular mechanisms  
48 underlying the development and regulation of the polledness trait.

49 **Keywords:** goat polledness; GWAS; CNV; *ERG*; *FOXL2*; hornlessness formation

50

## 51 **Background**

52 Breeding of polled animals is an important goal for farming horned animals, such as  
53 cows, beef cattle, sheep, and goats, for animal welfare and economic reasons. There  
54 are several polled cattle and sheep breeds, such as Angus, Galloway, and hornless  
55 Dorset, in which the autosomal dominant polled allele has already been fixed<sup>[1-3]</sup>.  
56 However, the hornless goat breed has never been bred successfully, although goat  
57 polled markers have been extensively used in many countries<sup>[4]</sup>. In 1944, it was  
58 reported that goat polledness is closely linked with intersexuality. It is noteworthy to  
59 mention that intersexuality is a recessive trait, whereas polledness is a dominant  
60 trait<sup>[5]</sup>. The homozygous polled allele is accompanied by the generation of sex-  
61 reversing effect in XX individuals or mechanical obstruction of the epididymis for  
62 some XY individuals, resulting in breeding failure in hornless goats<sup>[4]</sup>.

63 The molecular mechanism responsible for development of polledness and  
64 intersexuality in goats has been studied extensively. Vaiman et al. found four  
65 microsatellite markers at 1q43a associated with the polled/intersex syndrome (PIS)  
66 based on linkage analysis<sup>[6, 7]</sup>. Using a positional cloning approach, Pailhoux et al.  
67 identified an 11.7 kb deletion that triggered intersexuality and polledness by  
68 modulating the expression of *PISRT1* and *FOXL2*<sup>[8]</sup>. Gene knockout indicates that  
69 *FOXL2*, rather than *PISRT1*, is the causal gene responsible for the intersex of XX  
70 individuals<sup>[9]</sup>. It was also found that the expression of *PISRT1* and *FOXL2* was  
71 significantly increased in the horn buds of heterozygous or homozygous individuals  
72 without horns<sup>[8]</sup>. In addition, genome-wide association mapping of the polled locus  
73 revealed a strong signal on chromosome 1<sup>[10]</sup>. However, there is no direct evidence  
74 that *PISRT1* and *FOXL2* are responsible for the formation of polledness.

75 The formation of the horn is a very complex biological process that involves the  
76 differentiation and remodeling of various tissues, including the keratinization of the  
77 horn bud epidermis, ossification of the dermis and hypodermis of horn buds, and  
78 fusion with the skull<sup>[11]</sup>. The formation of horns is a successful evolutionary event.  
79 Recent studies have shown that pecorans with headgear-specific regulatory elements  
80 may play an important role in early cell remodeling during headgear development<sup>[12]</sup>.  
81 However, certain signaling pathways may interfere the process of horn development,  
82 which in turn leads to abnormal cellular remodeling, thus resulting in polledness. The  
83 causative genes underlying polledness have been identified for some species. A 1.8 kb  
84 insertion in the 3' untranslated region (3' UTR) of *RXFP2* has been identified to be  
85 associated with the horn/polledness of sheep<sup>[13]</sup>; *RXFP2* pseudogenization has been  
86 identified in Moschidae and Hydropotinae<sup>[12]</sup>, and a 212 bp insertion near gene  
87 *OLIG1* (~65 kb away) was found to produce hornless cattle<sup>[14]</sup>. Recently, two groups  
88 reported that a novel intersexuality-associated variant consisting of ~0.48 Mb  
89 duplicated fragment (including *ERG* and *KCNJ15*) downstream of the ~20 Mb PIS  
90 region was reversely inserted into the *PIS* locus of goat<sup>[15, 16]</sup>. However, the  
91 development of polledness trait in goats is very special because it is closely related to  
92 intersexuality, which increases the difficulties in the identification of hornless-related  
93 genes.

94 This study aims to employ sophisticated sequencing techniques to identify causative  
95 variants and to discover the genetic mechanisms underlying polledness trait

96 development in goats.

## 97 **Materials and Methods**

### 98 **Animal resources**

99 Six native Chinese goat breeds were selected. All 381 Jining gray goats were sampled  
100 from Jining, Shandong Province, China, including polled (66) and horned (316)  
101 animals. A total of 735 Wushan white (WSW) goats were sampled from Wushan,  
102 Chongqing Province, China. Of these, 592 had horns and 143 were polled. Eleven  
103 Yunnan black bone (YNBB) goats (including four horned and seven polled goats) and  
104 eight Guizhou black (GZB) goats (including five horned and three polled goats) were  
105 sampled from southwest China. Ten polled Matou (MT) goats were sampled from  
106 Shangqiu, Henan Province, China. Eleven Ujumqin cashmere (UC) goats were  
107 sampled from Ujumqin, Inner Mongolia, China, including polled (3) and horned (8)  
108 animals. The sixth population was 30 horned Chaidamu cashmere (CDMC) goats  
109 sampled from Haixi, Qinghai Province, China. The sampling of each animal involved  
110 the collection of 1 ml of whole blood. All animal procedures were approved by the  
111 Life Ethics and Biological Safety Review Committee of BGI and were carried out  
112 following the approved guidelines.

### 113 **Genotyping and quality control**

114 DNA was extracted from blood samples. The genomic DNA of each sample was  
115 digested with 1  $\mu$ l Fast Digest TaqI (Fermentas; Thermo Scientific, Waltham, MA,  
116 USA) for 10 min at 65 °C in a reaction volume of 30  $\mu$ l. For the ligation reaction, 1  $\mu$ l  
117 of barcoded adapters (10  $\mu$ M) was added to individual wells, along with T4 DNA  
118 ligase (Enzymatic) in a total volume of 40  $\mu$ l. The ligation reaction was incubated for  
119 1 h at 22 °C and heat-inactivated at 65 °C for 20 min. Twenty-four ligation products  
120 for different samples were pooled into a single tube, and 2  $\mu$ l of chloroform was  
121 added to inactivate the restriction enzyme. The mixtures were centrifuged at 12000  
122 rpm for 1 min, and the supernatant was transferred to a new tube. DNA fragments  
123 between 400-700 bp were selected on a 2% agarose gel (Amresco) and purified using  
124 a QIA quick Gel Extraction Kit (Fermentas; Thermo Scientific, Waltham, MA, USA).  
125 Samples were resuspended in 50  $\mu$ l elution buffer and amplified by 10 cycles of PCR.  
126 The amplified library was purified using a QIA quick PCR Purification Kit  
127 (Fermentas; Thermo Scientific, Waltham, MA, USA), quantified on the Agilent2100  
128 Bioanalyzer, and sequenced on an Illumina Hiseq2000 instrument with PE90 (Jining

129 gray goat) or MGISEQ-500 sequencer with PE100 (WSW goat). The clean reads were  
130 mapped to the goat reference genome (ASM170441v1)  
131 ([https://www.ncbi.nlm.nih.gov/genome/?term=capra\\_hircus](https://www.ncbi.nlm.nih.gov/genome/?term=capra_hircus)) using BWA software  
132 (version 0.7.12); Samtools software (<http://samtools.sourceforge.net/>) was used to  
133 generate the consensus sequences for each goat and prepare input data for single  
134 nucleotide polymorphism (SNP) calling with realSFS (version 0.983)  
135 (<http://www.popgen.dk/angsd/index.php/RealSFS>), based on the Bayesian estimation  
136 of site frequency at every site. Raw SNPs with sequencing depth greater than 2500 or  
137 less than 50, mostly resulting from repetitive regions or alignment errors, were  
138 removed for SNPs with extreme sequencing depth. An SNP was removed if its call  
139 rate was lower than 80%, its minor allele frequency (MAF) was less than 1%, or the  
140 proportion of its heterozygous genotypes was more than 60%; then SNPs were  
141 imputed with fastPhase (version 1.4) and Beagle software (version 5.1). The variants  
142 were filtered following the criteria:  $MAF > 0.01$ , imputation information score  $> 0.9$ ,  
143 and p-value of Hardy-Weinberg equilibrium (HWE)  $> 1e-6$ .

#### 144 **Genome-wide association study (GWAS)**

145 A total of 381 JNG and 735 WSW goats were collected, including 908 horned and  
146 209 polled goats. Polled and horned animals were assigned as the cases and controls,  
147 respectively. The linear mixed model was used for the association study,  $y = \mu +$   
148  $Xb + Z\alpha + e$ , where  $y$  is the vector of phenotypes,  $\mu$  denotes the overall mean,  $\alpha$   
149 represents the polygenic effect, and  $b$  is the estimator of fixed effects;  $e$  is a residual  
150 error, assumed to follow a normal distribution  $e \sim N(0, \sigma_e)$ , and  $X$  and  $Z$  are incidence  
151 matrices for  $b$  and  $\alpha$ , respectively. The GWAS was conducted using the EMMAX  
152 software (<http://csg.sph.umich.edu/kang/emmax/download/index.html>). The  
153 significant threshold for association was set as 0.01 divided by the SNP number.

#### 154 **Whole genome sequencing for fine mapping**

155 Nine JNG, including four horned and five polled goats, were collected from Jining  
156 City, Shandong Province. The whole genome of each goat was sequenced using the  
157 BGISEQ-500 platform (PE100). The total sequencing amount for nine goats was  
158 620.88 GB, and the sequencing reads were mapped onto the reference genome using  
159 BWA software.

160 In addition to JNG, five additional domestic goat breeds were collected (Additional  
161 file 1: **Table S1 and Fig. S1**). The genomic DNA of these sampled goats was

162 extracted from blood or ear tissue and sequenced using the BGISEQ-500 or BGISEQ-  
163 2000 platform (PE100). The average sequencing coverage of CDMC, GZB, UC, JNG,  
164 YNBB, MT were 10.37×, 8.86×, 12.07×, 23.65×, 21.7×, and 10.87×, respectively. The  
165 raw reads were filtered with SOAPnuke1.5.0 ([https://github.com/BGI-](https://github.com/BGI-flexlab/SOAPnuke)  
166 [flexlab/SOAPnuke](https://github.com/BGI-flexlab/SOAPnuke)) and cleaned reads were mapped to the reference genome  
167 (GCA\_001704415.1 ARS) using Bwa-0.7.12 ([https://sourceforge.net/projects/bio-](https://sourceforge.net/projects/bio-bwa/files/)  
168 [bwa/files/](https://sourceforge.net/projects/bio-bwa/files/)); the variants were imputed with STITCH R package, and filtered following  
169 the criteria: MAF>0.05 and HWE<10<sup>-6</sup>.

### 170 **Long-read whole genome sequencing**

171 One polled goat was selected from nine JNG, and 37.22 Gb length was sequenced  
172 using the PacBio sequencing platform; the average read length was 12.94 kb. The  
173 sequencing reads were stored in BAM format and converted to FASTA by  
174 BAM2FastA the software smrtlink\_4.0.0.190159  
175 (<https://www.pacb.com/support/software-downloads/>). The transformed sequencing  
176 reads were then aligned to the goat reference genome using the ngmlr-0.2.7 software  
177 (<https://github.com/philres/ngmlr>). Samtools were used to transfer the Sam files to  
178 BAM files. Finally, the IGV software (<https://igv.org/>) was used to view the  
179 sequencing reads.

### 180 **Sanger sequencing**

181 One PacBio sequencing read spanning the breakpoint was selected. The sequencing  
182 reads were aligned to chromosome 1 of the goat reference genome (accession number:  
183 NC\_030808.1) using BLASTN and then manually spliced. Primers were designed to  
184 span the fusion breakpoint using the Primer3-py package  
185 (<https://www.yeastgenome.org/primer3>). A set of three PCR primers that amplified a  
186 series of specific bands was designed for genotyping horns and polled alleles. Primer  
187 and protocol information is shown in Additional file 1: Table S2. The composition of  
188 the reaction mixture for the PCR was as follows: 10 µl Premix Taq (Ex Taq Version  
189 2.0 plus dye, TaKaRa, Japan), 0.3 µl each of forward and reverse primer (10µM), 1 µl  
190 template DNA (20ng/ul), and 8.4 µl ddH<sub>2</sub>O. PCR was performed using S1000  
191 (BIORAD, USA) under the following cycling conditions: 2 min at 98 °C, followed by  
192 29 cycles of denaturation, annealing, and extension at 98 °C, 30 sec at 58 °C, and 35  
193 sec at 72 °C and a final extension for 2 min at 72 °C. The fragment length of PCR  
194 products was detected by 1.2% agarose gel electrophoresis using 5 µl of 100 bp DNA  
195 Ladder (TaKaRa, Japan) and gel stain (TransGen Biotech, China). A gel image of the

196 different genotypes is shown in Fig. 4. The products were sequenced by Sanger  
197 sequencing and compared to the manually spliced reference sequence to validate the  
198 gene fusion. Sequence chromatograms were aligned and analyzed using the  
199 SnapGene2.3.2.

#### 200 **SINE sequence analysis**

201 Using BLASTN software, SINE-like sequences were aligned with the genomes  
202 of bison, cow, goat, antelope, yak, and sheep. Then we collected horn-specific SINE-  
203 like sequences that mapped to any of the selected species (E-value < 1e-5, identity ≥  
204 90%). After downloading the reference genome annotation file for the above species,  
205 gene annotation was performed in the 500 kb range around the horn-specific SINE-  
206 like sequence location. Finally, the annotated gene list was uploaded to Metascape  
207 (<https://metascape.org/gp/index.html#/main/step1>) for Gene Ontology (GO) and  
208 Kyoto Encyclopedia of Genes and Genomes (KEGG) enrichment analyses.

#### 209 **RNA-sequencing**

210 For RNA sequencing, we immediately collected ear specimens from five newborn  
211 Jining gray lambs and genotyped them by PCR using breakpoint primers. After that,  
212 two-horned (-/-) and three polled (inserted/-) lambs were euthanized by stunning at 4-  
213 day postpartum, and skin specimen and horn buds were collected and stored at -  
214 80 °C.

215 Total RNA was extracted from the skin and horn bud tissue of two horned and three  
216 polled goats using TRIzol reagent (Invitrogen, South San Francisco, CA, USA)  
217 following the manufacturer's protocol. RNA integrity was evaluated using the Agilent  
218 2100 Bioanalyzer (Agilent Technologies, Santa Clara, CA, USA), and 1.5 µg total  
219 RNA per sample was used as the input material for RNA sample preparation. The  
220 Illumina TruSeq RNA Sample Preparation kit (Illumina, San Diego, CA, USA) was  
221 used to construct transcriptomic libraries according to the manufacturer's instructions  
222 [17]. Then, these libraries were sequenced on the Hiseq X10 platform at BGI  
223 (Shenzhen, China), and 150 bp paired-end reads were generated.

224 Sequence reads (paired-end, 150 bp) were trimmed using SOAPnuke (version 1.5.6).  
225 Then, the clean reads were aligned to the reference genome (GCA\_001704415.1  
226 ARS) using hisat2 (v2.1.0), and the number of reads mapped to the genome was  
227 counted using featureCounts. Based on the raw read counts, the R package DESeq2  
228 was used to determine differentially expressed genes (DEGs), and reads with sum less  
229 than 2 was filtered out. Both corrected  $p\text{-adj} \leq 0.05$ , and absolute  $\log_2\text{foldchange} \geq 1$

230 value were set as the significant threshold for determining DEGs. Selected gene lists  
231 were subjected to GO term enrichment analysis using the Metascape database, and p-  
232 values were calculated based on the accumulative hypergeometric distribution.

### 233 **Availability of data and materials**

234 The datasets generated and/or analyzed during the current study are available in the  
235 CNGB repository (CNSA: <https://db.cngb.org/cnsa>; accession number CNP0001896  
236 and CNP0001914). The data that support the findings of this study are available from  
237 the corresponding authors upon reasonable request.

238

## 239 **Results**

### 240 **Identification of candidate causal mutations for goat polledness in six Chinese** 241 **native breeds**

242 We collected 381 female Chinese Jining Gray (JNG) goats including 315 horned goats  
243 and 66 polled goats and further genotyped genome variants with double-digest  
244 restriction-site-associated DNA sequencing (ddRAD-seq), after which 107,012 SNPs  
245 were retained for the analysis. We then performed an association study using a mixed  
246 linear model that accounted for the polygenic effect using genomic kinships.  
247 Strikingly, a strong signal at ~150 Mb of chromosome 1 was identified ( $p = 1.55e-42$ )  
248 (Fig. 1A). We then repeated the association with another goat breed of Wushan white  
249 (WSW) goats, including 592 horn goats and 143 polled goats genotyped with ddRAD  
250 sequencing. After quality control, 274,328 high quality SNPs were discovered.  
251 Evidently, the highest signal was localized at region 150Mb with p-values  $1.79e-46$   
252 (Fig. S2), consistent with the results identified in the JNG goat population.

253

### 254 **Fig. 1 Genome-wide association and fine mapping study for identification of 483.5 kb CNV.**

255 (A) Genome-wide association study (GWAS) of polled/horn loci in Jining Gray (JNG) goat, the  
256 highest signal localizes at ~150Mb, and the next highest signal localizes at ~129Mb (PIS region).  
257 (B) The association study with 79 whole-genome resequenced goats from six breeds, 31 of polled  
258 and 48 horned, reveals that the signals at 150 Mb in the GWAS analysis are completely collapsed  
259 and no signals exceed the threshold. (C) The averaged read depths of five polled goats (red) and  
260 four horn goats (blue); the split reads events at breakpoints are shown below, it reveals that depth  
261 of reads of polled goats are strikingly higher than that of horn goats.

262 Next, we mapped the causative variant for goat polledness with whole-genome  
263 resequencing. We took advantage of multiple goat breeds to reduce the linkage



264 equilibrium between variants. To do this, we collected 79 goats from six breeds,  
 265 including 18 polled and 61 horned goats (Additional file 1: Fig. S1 and Table S1). All  
 266 goats were sequenced with either Illumina Hiseq 2500 or the BGISEQ-500 platform  
 267 with coverage of 8.86 to 23.65. After variant calling, filtration, and imputations,  
 268 14,978,368 variants were analyzed. Assuming that the polledness of different goat  
 269 breeds was controlled by the same causative variant, we performed genome-wide  
 270 association across breeds to identify polled loci using a linear model. However, the  
 271 signal of 150 Mb on chromosome 1 that had been identified in JNG and WSW goat  
 272 populations completely collapsed, and no variants reached a significant level (Fig.  
 273 1B). We hypothesized that the real causative variant did not exist in the variant set for  
 274 the association study but instead linked with them in different linkage phases within  
 275 each population, such that different directions of variants canceled the association  
 276 signals. Furthermore, structural variants, such as copy number variation (CNV),  
 277 which had not been genotyped with conventional bioinformatics pipelines, were used  
 278 to identify causal variants for goat horn/polledness. By contrasting the read depths  
 279 between four horned and five polled JNG goats, soon we discovered an obvious 483.5  
 280 kb CNV localized at ~150 Mb on chromosome 1 with a read depth ratio between the  
 281 horn and polled groups ~2:3 (1:1.62) (Fig. 1C), suggesting that the horn goats had two  
 282 copies of the 483.5 kb CNV, whereas the polled goats had three copies (heterozygous  
 283 CNV). We then determined the breakpoints at single-base pair resolution using the  
 284 split-read method. The results revealed that a 483.5 kb CNV locus on chromosome 1  
 285 (ASM170441v1, chr1:150,334,567-150,818,099), spanning the ETS transcription  
 286 factor *ERG*, and overlapping potassium inwardly-rectifying channel subfamily J  
 287 member 15 (*KCNJI5*). We additionally validated the 483.5 kb CNV with 70 goats  
 288 from five breeds, including 23 polled and 47 horn goats. This CNV was present in 23  
 289 cases (100%) and 0 controls (0%) (Table1, Additional file 1: Fig. S3-21), suggesting  
 290 the 483.5 kb CNV is most likely the causal variant for goat horn/polledness.

291 Table 1 Frequencies of genotypes of 483.5kb CNV in six goat populations

| Populati<br>on | Location                     | Phenotype | Genotypic frequencies |          |           | Sizes |
|----------------|------------------------------|-----------|-----------------------|----------|-----------|-------|
|                |                              |           | CNV/CNV               | CNV/wild | Wild/wild |       |
| JNG            | Jining, shandong<br>province | Horned    | 0                     | 0        | 1.00      | 5     |
|                |                              | Polled    | 0                     | 1.00     | 0         | 4     |
| YNBB           | Lanping, Yunan<br>province   | Horned    | 0                     | 0        | 1.00      | 4     |
|                |                              | Polled    | 0                     | 1.00     | 0         | 7     |

|      |                  |        |   |      |      |    |
|------|------------------|--------|---|------|------|----|
| GZB  | Guiyang, Guizhou | Horned | 0 | 0    | 1.00 | 5  |
|      | province         | Polled | 0 | 1.00 | 0    | 3  |
| CDMC | Haixi, Qinghai   | Horned | 0 | 0    | 1.00 | 30 |
|      | province         |        |   |      |      |    |
| UC   | Ujimqin, Inn     | Horned | 0 | 0    | 1.00 | 8  |
|      |                  | Polled | 0 | 1.00 | 0    | 3  |
| MT   | Shangqiu, Henan  | Polled | 0 | 1.00 | 0    | 10 |
|      | province         |        |   |      |      |    |

292 Note: JNG: Jining Gray goats; YNBB: Yunnan black bone goats; GZB: Guizhou black goats;  
293 CDMC: Chaidamu cashmere goats; UC: Ujumqin cashmere goats; MT: Matou goats.  
294 Taking advantage of whole-genome resequencing, we re-identified the 11.7 kb  
295 deletion for PIS<sup>[8]</sup> with single base-pair resolution (129,424,780–129,434,940bp)  
296 using the split-read method. When closely examining the breakpoints of the 11.7 kb  
297 deletion, some sequencing reads at the left/right outer edge of the 11.7 kb deletion  
298 were split and reversely mapped to the right/left inner edge of the ~150 Mb CNV  
299 (Fig. S22a, Fig. S23-S27). This suggests that the 483.5 kb CNV and 11.7 kb deletion  
300 are jointed, and the 483.5 kb deletion is reversely inserted into the 11.7 kb deletion to  
301 form a translocation (named Polledness translocation t (1; 1)). We then validated the  
302 Polledness translocation t (1; 1) using a long-read sequencing platform PacBio  
303 (average read length of ~12.94 kb). The results showed that this translocation was  
304 successfully re-identified (Fig. S22b), which strongly confirmed the reliability of the  
305 Polledness translocation t (1; 1). Finally, we applied the PCR-based method to  
306 validate the CNV in six JNG goats, including three polled and three horned goats. As  
307 expected, we obtained the target fragment for polled goats at either the left or right  
308 breakpoints (Fig. 2A, C), whereas no PCR products were amplified for horned goats  
309 (Fig. 2A, C). The PCR products of the polled gray goats were further validated by  
310 Sanger sequencing (Fig. 2B). We then validated the Polledness translocation t (1; 1) in  
311 other goat breeds, including randomly sampled 6 WSW (three polled and three horn  
312 goats), six UC (three polled and three horn goats), six GZB (three polled and three  
313 horn goats), three CDMCs (all horn goats), and three MT (all polled goats). The  
314 results showed that the target fragment of all polled individuals was amplified at  
315 either the left or right breakpoints, whereas no PCR products of horned individuals  
316 were amplified (Fig. 2C).

317

318 **Fig. 2 PCR validation of the translocation in six goat breeds.** (A) Detection of PCR product for  
319 left and right breakpoints of horn and polled JNG goats. Horned goats with wild-type allele cannot  
320 be amplified, while polled goats have the duplication that allows amplification of the fragments at  
321 the junction. Hsp90 was used as a positive control. Arrows represent the position and direction of  
322 primers. (B) Sanger sequencing of the PCR products from gRBP2 and glbp3 bands. The results  
323 confirmed by Sanger sequencing were consistent with inferred sequence insertion patterns. The  
324 483.5kb translocation is shaded in light blue. (C) Gel images of electrophoresed PCR products of  
325 the horn locus in horn and polled individuals of different goat breeds.

### 326 **Conservative analysis of the sequence of the Polledness translocation t (1; 1)**

327 Analysis of sequence features flanking the breakpoints of the 483.5 kb CNV revealed  
328 a 322 bp conserved repeat sequence in the first intron of the *ERG* gene (150,817,512-  
329 150,817,809) (Fig. 3A, B). BLAST analysis showed that this sequence was a type of  
330 SINE sequence, similar to a tRNA pseudogene coupled to an A element (Bov-tA)  
331 (Additional file 1: Fig. S28), which has not been reported in the literature yet <sup>[12]</sup>. The  
332 horned goats had two copies of the SINE sequence, whereas the polled goats had  
333 three copies (heterozygous) or four copies (homozygous). We then aligned the SINE  
334 sequence to the genomes of several horned animals such as cows, goats, sheep, chiru,  
335 and yak, and found that it is highly conserved in these horned species (Fig.3C).

336

337 **Fig.3 The nucleotide sequence and conservative analysis of the Horn-SINE element.** (A) the  
338 Horn-SINE is located at the first intron of *ERG* gene. The schematic diagram indicates the gene  
339 structure of *ERG*. The red arrow indicates the Horn-SINE in our study. (B) The nucleotide  
340 sequence of the 5' flanking region of the Polledness translocation t (1; 1). The PIS region sequence  
341 (129M) is in boldface. The Horn-SINE sequence is underlined. (C) Multiple sequence alignment  
342 of Horn-SINE sequence of five horned species (Goat, Sheep, Cow, Yak, and Siberian musk deer).  
343 Interestingly, this SINE sequence (named Horn-SINE) can also be identified in other  
344 regions of the horned species' genome, with a BLAST identity score of more than  
345 91%. Subsequently, we extracted the Horn-SINE overlapping genes in the genomes of  
346 goats, cows, sheep, chiru, and yak, corresponding to 195, 177, 321, 205, 148, and 76  
347 genes, respectively (Additional file 1: Fig. S29; Additional file 2: s1). They were  
348 significantly enriched in the signaling pathway regulating the RAC1 GTPase cycle  
349 (adjusted P-value= $10^{-8.35}$ ) and nervous system development (adjusted P-value= $10^{-6.26}$ )

350 (Additional file 1: Fig. S29; Additional File 2: s4). The RAC1 GTPase cycle plays an  
 351 essential role in osteoclasts by regulating actin dynamics, and nervous system  
 352 development is also associated with horn growth<sup>[18, 19]</sup>. In addition, we extracted the  
 353 genes in the 50 kb and 250 kb regions on both sides of the SINE-like element and  
 354 analyzed the gene function category and enrichment (Additional file 2, s2, s3). The  
 355 results showed that nervous system development, small GTPase mediated signal  
 356 transduction, human cancer, and signaling by receptor tyrosine kinases were  
 357 significantly enriched (Additional file 1: Fig. S30-31; Additional file 2: s5 and s6). To  
 358 further elucidate the relationship between Horn-SINE element-related genes and horn  
 359 formation-related genes, we downloaded the horn-specific expression genes of goat  
 360 and sheep (data from PRJNA438286; Additional file 2: S7) and accessed DEGs  
 361 between horned and polled bovines (data from Wiedemar<sup>[20]</sup>; Additional file 2: S8)  
 362 from previously published transcriptome data<sup>[12, 20]</sup>. The horn-specifically expressed  
 363 genes were enriched in signaling by receptor tyrosine kinases and head development  
 364 (Additional file 1: Fig. S32; Additional file 2: S9), while the bovine DEGs were  
 365 enriched in both nervous system and head development (Additional file 1: Fig. S33;  
 366 Additional file 2: S10). Taken together, pathways regulating the nervous system and  
 367 head development were enriched in almost all groups (Table. 2), demonstrating the  
 368 reliability of our results.

369 Table 2. Enrichment analysis of SINE-like associated genes in horned animals

| Pathway                                      | Overlap<br>ped | 100k<br>flanking | 500k<br>flanking | Horn-<br>specific<br>genes | DEGs in<br>horned<br>cattle |
|----------------------------------------------|----------------|------------------|------------------|----------------------------|-----------------------------|
| Nervous system development                   | √              | √                | √                | √                          | √                           |
| RAC1 GTPase cycle                            | √              |                  |                  |                            |                             |
| Human cancer                                 |                | √                | √                | √                          |                             |
| Signaling by receptor tyrosine<br>kinases    |                | √                | √                | √                          |                             |
| Head development                             |                | √                | √                | √                          | √                           |
| Small GTPase mediated signal<br>transduction |                | √                |                  |                            |                             |
| Skeletal system development                  |                |                  | √                |                            | √                           |

370 **Notes:** overlapped: element located in the gene. 100k flanking: 50 kb flanking each side of the  
 371 element; 500k flanking: 250 kb flanking each side of the element; Horn-specific genes: genes  
 372 expressed explicitly in horn bud of goat and sheep; DEGs in horned cattle: genes differentially

373 expressed in horn buds between horned and polled cattle. **Abbreviations:** DEGs, differentially  
374 expressed genes.

### 375 **Gene expression studies reveal novel horn development-specific candidates**

376 Initially, we investigated the DEGs at the horn bud between horned and polled goats  
377 and between facial skin tissues and horn bud. Five goats (three polled and two horned)  
378 were sacrificed at day 4 after birth and the horn buds and facial skin tissues were  
379 harvested for isolation of the total RNA, and the ten mRNA samples were sequenced  
380 to investigate the possible effects of the polled mutation on gene expression. Finally,  
381 1077 DEGs between horn bud and skin tissue in polled goats were identified, among  
382 which 776 upregulated genes in horn bud tissues of polled goats were enriched in  
383 skeletal muscle tissue development and blood circulation. There were 1222 DEGs  
384 between horn bud and skin tissue in horned goats, and 504 upregulated genes were  
385 enriched in cornification and skin development ( $-\log_{10}(\text{p-value}) = 9.86$ ) (Fig. 4A, B  
386 and Additional file 3, S1-S2 and Additional file 4: S1-S4). In addition, 367 DEGs in  
387 horn buds between horned and polled goats were identified, which were enriched in  
388 muscle structure development ( $-\log_{10}(\text{p-value}) = 63.00$ ) and skeletal system  
389 development pathways ( $-\log_{10}(\text{p-value}) = 4.59$ ) (Fig. 4A, B and Additional file 3:  
390 Table S3 and Additional file 4: Table S5-S6). We next investigated the alterations in  
391 the expression of key genes near or on the Polledness translocation t (1; 1), including  
392 *KCNJ15*, *ERG*, *FOXL2*, and *ETS2*, among which *FOXL2* has been identified as a  
393 causal factor for PIS<sup>[9]</sup>. For genes in or near the CNV and 11.7kb deletion region,  
394 *ERG* and *FOXL2* were upregulated in horn bud tissues compared to skin tissue of  
395 polled goats, whereas *KCNJ15* and *ETS2* were not differentially expressed (Fig. 4C).  
396 Furthermore, we found that *ERG* and *FOXL2* were upregulated in horn bud tissues of  
397 polled goats compared to the horn bud tissues of horned goats (Fig. 4C). We also  
398 found that *ERG*-targeted genes, like *IGF2* and *IGFBP1*<sup>[21]</sup> were upregulated, while  
399 some interactive genes, such as homeobox genes, *Hoxc6*, 8, 9, 5, and *Hoxb7*, 6, 3, as  
400 well as *Hoxa9*, 7<sup>[22-24]</sup> were downregulated in horn bud tissues of polled goats  
401 (Additional file 3: Table S1). In addition, *FOXL2*-regulated genes, such as some  
402 collagen genes<sup>[25]</sup>, were upregulated in the horn bud tissues of polled goats too  
403 (Additional file 3: Table S1).

404

405 **Fig. 4 Abnormal Gene Expression in horn bud of polled goat at 4-day postnatal stage. (A)**

406 Heatmap illustration showing differentially expressed genes (DEGs) ( $\text{p-adj} < 0.05$ ) obtained by

407 pairwise comparison between horn bud and skin of polled and horned goats, as well as between  
408 horn bud of horned and polled goats. (B) Gene ontology analysis of the differentially expressed  
409 genes in (A). Dashed lines separate different groups, GO enrichment of DEGs in up, middle, and  
410 bottom corresponding to left, middle, and right in (A); (C) The expression of *ERG*, *ETS2*, *FOXL2*,  
411 and *KCNJ15* in horn bud and skin tissue of horn (green) and polled (red) goats.

## 412 **Discussion**

413 In this study, we found that for all the polled goats regardless of goat breeds, the  
414 483.5kb CNV was inserted into an 11.7 kb deletion to form the Polledness  
415 translocation t (1; 1), but this translocation did not occur in any of the horned goats.  
416 Our GWAS and fine-mapping results were consistent with the two recent research  
417 results from Switzerland and China that used long-read whole-genome sequencing of  
418 two genetically female goats (a PIS-affected and a horned control) and whole-genome  
419 selective sweep of intersex goats from China, respectively<sup>[15, 16]</sup>. Although the results  
420 of the three groups are consistent, our study is different from the other two studies.  
421 We took advantage of multiple breeds to fine map causative mutations. We first used  
422 GWAS to identify a region using natural goat populations (381 JNG goats and 735  
423 WSW goats), and used multiple goat breeds to exclude all SNP and INDEL variants  
424 and then used resequencing to identify structural variants. In contrast, the other two  
425 research groups used long-read whole-genome sequencing or selective sweep analysis  
426 to identify structural variants in intersex and non-intersex goat populations<sup>[15, 16]</sup>. Due  
427 to the close linkage of polledness and intersex, research based on different ideas could  
428 obtain similar results. This indicates the reliability of our results. In addition, we also  
429 verified the 483.5 kb CNV in more breeds of goats, indicating that goat hornless traits  
430 have a consistent genetic mechanism. Finally, the previous two articles only found  
431 more complex mutations in the PIS region and did not elaborate the molecular  
432 mechanisms of polledness.

433 PIS is a unique phenomenon in goats. There is no such phenomenon in other horned  
434 animals, indicating that gonad development and horn development are not necessarily  
435 related. The development of PIS is related to the complex structural variation in  
436 chromosome 1 of goats. Previous results showed that the deletion of 11.7 kb activated  
437 the expression of *FOXL2* in gonadal tissue, which in turn led to the occurrence of  
438 sexual reversal<sup>[8]</sup>. The gene knockout results confirmed that the intersex causative  
439 gene was *FOXL2*<sup>[9]</sup>. However, how the 11.7 kb deletion regulates the formation of  
440 polledness is still unknown. The 483.5 kb CNV is translocated into the PIS region,

441 providing novel insights into the genetic mechanism of goat polledness.  
442 Sequence conservation analysis and functional element identification showed that a  
443 SINE sequence was located in the first intron of the *ERG* gene near the left  
444 breakpoint, which is specific to horned animals. This Horn-SINE sequence is similar  
445 to a tRNA pseudogene coupled to an A element (Bov-tA), which belongs to the  
446 superfamily of tRNA-derived families of SINEs<sup>[26, 27]</sup>. These Bov-tA were established  
447 after the divergence leading to the establishment of Suidae and Bovidae families, and  
448 these SINE insertions may be informative for phylogenetic reconstructions of  
449 ruminants<sup>[28]</sup>. In addition, Horn-SINE also has multiple homologous copies in other  
450 genomic regions of horned species. These results indicate that Horn-SINE may have  
451 important biological functions in horn formation. SINEs are a class of  
452 retrotransposons transcribed by RNA polymerase III, which do not encode proteins.  
453 SINEs can function as cis-or trans-regulatory RNA elements that regulate gene  
454 expression from a distance as a tissue-specific enhancer<sup>[29]</sup>. Enrichment analysis of  
455 Horn-SINE-associated genes revealed that signal pathways related to neural  
456 development, RAC1 GTPase cycle, head development, signaling by receptor tyrosine  
457 kinases, and human cancer were enriched, which is consistent with other studies<sup>[12]</sup>.  
458 Further, we analyzed the goat and sheep horn-specific expression genes<sup>[12]</sup> and the  
459 DEGs between cattle horned and polled<sup>[23]</sup> using published data. The functional  
460 categories of these genes were highly consistent with the functional categories of  
461 SINE-related genes. These results suggest that the Horn-SINE is not an evolutionary  
462 trace formed by random insertion and is more likely to play a role in regulating horn  
463 development. This function may be achieved by regulating the expression of its  
464 surrounding genes; when translocation occurs, the 482.5kb CNV carrying SINE-like  
465 element results in abnormal expression of the causative gene in horn tissues, and this  
466 aspect is worthy of verification in subsequent experiments. In addition, we obtained  
467 only limited published transcriptome data and could not obtain transcriptome data at  
468 different developmental stages. In the future, we will analyze the expression patterns  
469 of Horn-SINE-related genes based on the comparative transcriptome data of horned  
470 and polled individuals at different developmental stages to further confirm the  
471 biological functions of Horn-SINE.  
472 It is well known that CNV not only affects the expression of related genes, but also  
473 affects the expression of genes located near the rearrangements at distances of up to  
474 several hundred kilobases<sup>[30]</sup>. This translocated and adjacent region contains three

475 genes, *ERG*, *KCNJ15*, and *FOXL2*, of which *ERG* does not contain the first exon. Our  
476 RNA-seq results showed that *ERG* and *FOXL2* were upregulated in the horned tissues  
477 of hornless goats, and there was no difference in skin tissues between polled and  
478 horned goats, whereas *KCNJ15* and *ETS2* were not differentially expressed in all  
479 tissues. Previous studies have also shown that *FOXL2* is absent in the gonadal tissue  
480 but upregulated in the horn bud tissue, and there may be a gonadal-specific regulatory  
481 element in the 11.7kb deletion region, which can inhibit the expression of *FOXL2* in  
482 gonadal tissue through its secondary structure<sup>[8]</sup>. The described breakpoint in the  
483 region of Chromosome 1 at 129Mb is in the *FOXL2* topologically associating domain  
484 (TAD) when compared to the corresponding human genome region<sup>[31]</sup>. In contrast, the  
485 duplicated genomic segment contains the *KCNJ* gene and parts of the *ERG* gene, as  
486 well as parts of the respective TADs. When the duplication is inserted into the  
487 breakpoint, it can be assumed that a fusion TAD (neo-TAD) is formed, consisting of  
488 one part of the duplication and the rest of the *FOXL2* TAD. This was confirmed by  
489 one recent study, which showed that the inserted duplication changed the original  
490 spatial structure of goat *CH11* and changed the appearance of several specific loop  
491 structures in the adjacent ~20kb downstream region of *FOXL2*<sup>[16]</sup>. Due to the  
492 inversion, *KCNJ* is placed on the other side of the boundary and isolated; thus,  
493 *KCNJ15* was not differentially expressed in all tissues between polled and horned  
494 goats. Therefore, it must be the “rest” of the *ERG* gene that is of functional  
495 importance. The *ERG* gene is a member of the erythroblast transformation-specific  
496 (ETS) family of transcription factors, which is expressed during the earliest events of  
497 skeletal formation and cooperates with *TGF-β* to regulate the differentiation of the  
498 sclerotome<sup>[32]</sup>. In humans, the *ERG* oncogene is frequently overexpressed due to  
499 chromosomal translocations, resulting in different fusion gene products<sup>[33-35]</sup>.  
500 Dysregulation of *ERG* can result in abnormal development of the chicken limbs<sup>[36]</sup>.  
501 We found that the two most abundant transcripts were transcribed from the 4th exon  
502 of *ERG* using intragenic promoters or regulatory elements in CNV (Additional file 3:  
503 Table S4). This fusion region also contains a horn-specific regulatory element that  
504 leads to the misexpression of *FOXL2* in the horn buds of polled goats. *FOXL2*,  
505 encoding a forehead transcription factor, plays a role in ovarian, skeletal, and muscle  
506 development<sup>[37, 38]</sup>. Previous reports revealed that *FOXL2* was overexpressed in the  
507 horn tissues of some other headgear animals, such as deer and cattle<sup>[12, 20]</sup>.  
508 Horn development is the result of the differentiation and remodeling of various



509 tissues, including the ossification of hypodermal tissue and keratinization of the horn  
510 bud epidermis<sup>[1]</sup>. In horned cattle, ossification of the developing horn occurs one  
511 month after birth, while it is suppressed in hornless cattle<sup>[39]</sup>. In our RNA-seq study,  
512 the results of GO or KEGG pathway analysis showed that most of the key genes  
513 involved in skeletal muscle development, like *PAX7*, *MYOD*, *MFY5*, *MYOG*, and  
514 *MIR133A*, were upregulated, while genes related to bone and nerve cell development,  
515 such as *HOXA9*, *HOXC9*, *HOXC5*, *PAPPA2*, and *OTOP3*, were downregulated in the  
516 horn bud of polled goats. The enrichment of these DEGs was associated with the  
517 abnormal development of goat horn. We found that upregulated expression of *ERG*  
518 and *FOXL2* lead to the upregulated expression of targeted genes, such as *IGF2*,  
519 *IGFBP1*, and collagen genes, which promoted the differentiation of skeletal muscle  
520 cells and inhibited the differentiation of bones and keratinocytes. Therefore, we  
521 assume a proposed model of hornless trait formation involving *ERG*- and *FOXL2*-  
522 related signaling pathway mediated by the Polledness translocation t (1; 1) (Fig. 5).

523

524 **Fig. 5 Proposed model of development of hornless trait involving *ERG*- and *FOXL2*-related**  
525 **signaling mediated by the Polledness translocation t (1; 1).** We show here that the PIS deleted  
526 region is in the *FOXL2* topologically associating domain (TAD), which inhibits neighboring genes  
527 expression including *FOXL2* and *PIRSTs* et al., while *ERG* is expressed normally at its location far  
528 away from the TAD region in horned goats. In polled goat, the duplication is inserted into the  
529 breakpoint, and a fusion TAD (neo-TAD) would be formed consisting of one part of the  
530 duplication and the rest of the *FOXL2* TAD. This neo-TAD may upregulate *ERG* and *FOXL2* in  
531 the horn buds of polled goats. The expression change of two genes may repress expression of  
532 some horn development-related genes and activate expression of other tissue-related genes, like  
533 those involved in skeletal development and muscle development, which inhibits horn  
534 development. Together, these results introduce a novel genetic mechanism required for  
535 establishing the proper conditions for development of polledness trait.

## 536 **Conclusions**

537 Our study provided evidence for a hornlessness-related 483.5kb CNV translocated  
538 into the previously identified 11.7kb PIS region, explaining why goat polledness is  
539 closely linked with intersexuality. We identified a horn-specific SINE-like element in  
540 the CNV region, and the enrichment analysis of the Horn-SINE-related genes  
541 revealed that the signaling pathways that were enriched are related to horn formation.  
542 We demonstrated a polledness formation model, in which horn-specific upregulation  
543 of two CNV-related genes, *ERG* and *FOXL2*, might repress the expression of some

544 horn development-related genes and activate the expression of genes involved in  
545 skeletal development, muscle development, among others, which results in horn  
546 development dysregulation. It is imperative that we provide a novel genetic  
547 mechanism for the classical Mendelian trait found in the last century.

### 548 **Ethics declarations**

549 This study was approved by the institutional review board of BGI (NO. FT 18041).

### 550 **Consent for publication**

551 Not applicable.

### 552 **Competing interests**

553 The authors declare that they have no competing interests.

### 554 **Funding**

555 This work was supported by the Science and Technology Innovation Strategy Projects  
556 of Guangdong Province (2019B020203002), National Natural Science Foundation of  
557 China Grant (31872560 and 31672399); Key Research and Development Project of  
558 Tianjin (20YFZCSN00720)

### 559 **Authors' contributions**

560 L.Y conceived, designed, and supervised the study with F.M., C.T., H. H., F. M., L.Y.,  
561 M.Z.P performed the informatics analysis of the sequencing data. Y.M.M., W.R.,  
562 Z.Q.F., L.Y.L., C.S.Y., Z.X.J., L.L obtained goat material and DNA for resequencing  
563 and genome sequencing. Z.X.J., W.R., L.L., Z.T.T obtained goat tissues and RNA for  
564 RAN-sequencing. C.T analyzed the transcriptome. L.Y., F.M., H.H., C.T. and Y.M.M  
565 are the major contributors in writing the manuscript. All authors read, revised, and  
566 approved the final manuscript.

### 567 **Acknowledgments**

568 We thank Hu Yeyong from Henan yudong animal husbandry co. LTD and Bayaertu &  
569 Yong quan from Dongwuzhumuqin Banner Aogali Animal Husbandry Co., Ltd  
570 provide MT goat and UC materials, respectively.

571

### 572 **References:**

573 1. WFD: **The physiology of horn growth: a study of the morphogenesis, the interaction of tissues and the**  
574 **evolutionary processes of a Mendelian recessive character by means of transplantation of tissues.** *J Exp Zool*

- 575 1935(69):347-405.
- 576 2. Bowman JC, Hendy C: **A study of retail requirements and genetic parameters of carcass quality in**  
577 **Polled Dorset Horn sheep.** *Animal Science* 1972, **2**(14):189-198.
- 578 3. LONG CR, GREGORY KE: **Inheritance of the horned, scurred, and polled condition in cattle.** *J*  
579 *HERED* 1978(69.6):395-400.
- 580 4. Pailhoux E, Vigier B, Schibler L, Crihiu EP, Cotinot C, Vaiman D: **Positional cloning of the PIS mutation**  
581 **in goats and its impact on understanding mammalian sex-differentiation.** *GENET SEL EVOL* 2005, **37** Suppl  
582 **1**:S55-S64.
- 583 5. SA A: **The genetic sex of intersexual goats and a probable linkage with the gene for hornlessness.**  
584 *Science.* 1944, **2563**(99):124.
- 585 6. Vaiman D, Koutita O, Oustry A, Elsen JM, Manfredi E, Fellous M, Crihiu EP: **Genetic mapping of the**  
586 **autosomal region involved in XX sex-reversal and horn development in goats.** *MAMM GENOME* 1996,  
587 **7**(2):133-137.
- 588 7. Vaiman D, Schibler L, Oustry-Vaiman A, Pailhoux E, Goldammer T, Stevanovic M, Furet JP, Schwerin M,  
589 Cotinot C, Fellous M *et al*: **High-resolution human/goat comparative map of the goat polled/intersex**  
590 **syndrome (PIS): the human homologue is contained in a human YAC from HSA3q23.** *GENOMICS* 1999,  
591 **56**(1):31-39.
- 592 8. Pailhoux E, Vigier B, Chaffaux S, Serval N, Taourit S, Furet JP, Fellous M, Grosclaude F, Crihiu EP,  
593 Cotinot C *et al*: **A 11.7-kb deletion triggers intersexuality and polledness in goats.** *NAT GENET* 2001,  
594 **29**(4):453-458.
- 595 9. Boulanger L, Pannetier M, Gall L, Allais-Bonnet A, Elzaïat M, Le Bourhis D, Daniel N, Richard C, Cotinot  
596 C, Ghyselinck NB *et al*: **FOXL2 is a female sex-determining gene in the goat.** *CURR BIOL* 2014, **24**(4):404-408.
- 597 10. Kijas JW, Ortiz JS, McCulloch R, James A, Brice B, Swain B, Tosser-Klopp G: **Genetic diversity and**  
598 **investigation of polledness in divergent goat populations using 52 088 SNPs.** *ANIM GENET* 2013, **44**(3):325-  
599 335.
- 600 11. Capitan A, Grohs C, Weiss B, Rossignol MN, Reverse P, Eggen A: **A newly described bovine type 2 scurs**  
601 **syndrome segregates with a frame-shift mutation in TWIST1.** *PLOS ONE* 2011, **6**(7):e22242.
- 602 12. Wang Y, Zhang C, Wang N, Li Z, Heller R, Liu R, Zhao Y, Han J, Pan X, Zheng Z *et al*: **Genetic basis of**  
603 **ruminant headgear and rapid antler regeneration.** *SCIENCE* 2019, **364**(6446).
- 604 13. Wiedemar N, Drogemuller C: **A 1.8-kb insertion in the 3'-UTR of RXFP2 is associated with polledness**

- 605 **in sheep. ANIM GENET** 2015, **46**(4):457-461.
- 606 14. Carlson DF, Lancto CA, Zang B, Kim ES, Walton M, Oldeschulte D, Seabury C, Sonstegard TS, Fahrenkrug  
607 **SC: Production of hornless dairy cattle from genome-edited cell lines. NAT BIOTECHNOL** 2016, **34**(5):479-  
608 481.
- 609 15. Simon R, Lischer H, Pienkowska-Schelling A, Keller I, Hafliger IM, Letko A, Schelling C, Luhken G,  
610 Drogemuller C: **New genomic features of the polled intersex syndrome variant in goats unraveled by long-  
611 read whole-genome sequencing. ANIM GENET** 2020, **51**(3):439-448.
- 612 16. E GX, Zhou DK, Zheng ZQ, Yang BG, Li XL, Li LH, Zhou RY, Nai WH, Jiang XP, Zhang JH *et al*:  
613 **Identification of a Goat Intersexuality-Associated Novel Variant Through Genome-Wide Resequencing and  
614 Hi-C. FRONT GENET** 2020, **11**:616743.
- 615 17. Yang Y, He JJ, Hu S, Chang H, Xiang X, Yang JF, Zou FC: **Comparative Study of Transcriptome  
616 Profiles of Mouse Livers and Skins Infected by Fork-Tailed or Non-Fork-Tailed Schistosoma japonicum.  
617 FRONT MICROBIOL** 2017, **8**:1648.
- 618 18. Itzstein C, Coxon FP, Rogers MJ: **The regulation of osteoclast function and bone resorption by small  
619 GTPases. Small GTPases** 2011, **2**(3):117-130.
- 620 19. Couly G, Creuzet S, Bennaceur S, Vincent C, Le Douarin NM: **Interactions between Hox-negative  
621 cephalic neural crest cells and the foregut endoderm in patterning the facial skeleton in the vertebrate head.  
622 DEVELOPMENT** 2002, **129**(4):1061-1073.
- 623 20. Wiedemar N, Tetens J, Jagannathan V, Menoud A, Neuenschwander S, Bruggmann R, Thaller G,  
624 Drogemuller C: **Independent polled mutations leading to complex gene expression differences in cattle. PLOS  
625 ONE** 2014, **9**(3):e93435.
- 626 21. Werner H, Meisel-Sharon S, Bruchim I: **Oncogenic fusion proteins adopt the insulin-like growth factor  
627 signaling pathway. MOL CANCER** 2018, **17**(1):28.
- 628 22. Alharbi RA, Pettengell R, Pandha HS, Morgan R: **The role of HOX genes in normal hematopoiesis and  
629 acute leukemia. LEUKEMIA** 2013, **27**(5):1000-1008.
- 630 23. Diffner E, Beck D, Gudgin E, Thoms JA, Knezevic K, Pridans C, Foster S, Goode D, Lim WK, Boelen L *et*  
631 *al*: **Activity of a heptad of transcription factors is associated with stem cell programs and clinical outcome in  
632 acute myeloid leukemia. BLOOD** 2013, **121**(12):2289-2300.
- 633 24. Lambert M, Alioui M, Jambon S, Depauw S, Van Seuningen I, David-Cordonnier MH: **Direct and Indirect  
634 Targeting of HOXA9 Transcription Factor in Acute Myeloid Leukemia. Cancers (Basel)** 2019, **11**(6).

- 635 25. Marongiu M, Deiana M, Marcia L, Sbardellati A, Asunis I, Meloni A, Angius A, Cusano R, Loi A, Crobu F  
636 *et al*: **Novel action of FOXL2 as mediator of Col1a2 gene autoregulation.** *DEV BIOL* 2016, **416**(1):200-211.
- 637 26. Lenstra JA, van Boxtel JA, Zwaagstra KA, Schwerin M: **Short interspersed nuclear element (SINE)**  
638 **sequences of the Bovidae.** *ANIM GENET* 1993, **24**(1):33-39.
- 639 27. Okada N, Hamada M: **The 3' ends of tRNA-derived SINEs originated from the 3' ends of LINEs: A**  
640 **new example from the bovine genome.** *J MOL EVOL* 1997, **44**:S52-S56.
- 641 28. Nijman IJ, van Tessel P, Lenstra JA: **SINE retrotransposition during the evolution of the Pecoran**  
642 **ruminants.** *J MOL EVOL* 2002, **54**(1):9-16.
- 643 29. Elbarbary RA, Lucas BA, Maquat LE: **Retrotransposons as regulators of gene expression.** *SCIENCE*  
644 2016, **351**(6274):c7247.
- 645 30. Spielmann M, Lupianez DG, Mundlos S: **Structural variation in the 3D genome.** *NAT REV GENET* 2018,  
646 **19**(7):453-467.
- 647 31. D'Haene B, Attanasio C, Beysen D, Dostie J, Lemire E, Bouchard P, Field M, Jones K, Lorenz B, Menten B  
648 *et al*: **Disease-causing 7.4 kb cis-regulatory deletion disrupting conserved non-coding sequences and their**  
649 **interaction with the FOXL2 promotor: implications for mutation screening.** *PLOS GENET* 2009,  
650 **5**(6):e1000522.
- 651 32. Cox MK, Appelboom BL, Ban GI, Serra R: **Erg cooperates with TGF-beta to control mesenchymal**  
652 **differentiation.** *EXP CELL RES* 2014, **328**(2):410-418.
- 653 33. Pflueger D, Rickman DS, Sboner A, Perner S, LaFargue CJ, Svensson MA, Moss BJ, Kitabayashi N, Pan Y,  
654 de la Taille A *et al*: **N-myc downstream regulated gene 1 (NDRG1) is fused to ERG in prostate cancer.**  
655 *NEOPLASIA* 2009, **11**(8):804-811.
- 656 34. Sankar S, Lessnick SL: **Promiscuous partnerships in Ewing's sarcoma.** *Cancer Genet* 2011, **204**(7):351-  
657 365.
- 658 35. Deplus R, Delliaux C, Marchand N, Flourens A, Vanpouille N, Leroy X, de Launoit Y, Dutерque-Coquillaud  
659 M: **TMPRSS2-ERG fusion promotes prostate cancer metastases in bone.** *Oncotarget* 2017, **8**(7):11827-11840.
- 660 36. Iwamoto M, Higuchi Y, Koyama E, Enomoto-Iwamoto M, Kurisu K, Yeh H, Abrams WR, Rosenbloom J,  
661 Pacifici M: **Transcription factor ERG variants and functional diversification of chondrocytes during limb**  
662 **long bone development.** *J CELL BIOL* 2000, **150**(1):27-40.
- 663 37. Georges A, Auguste A, Bessiere L, Vanet A, Todeschini AL, Veitia RA: **FOXL2: a central transcription**  
664 **factor of the ovary.** *J MOL ENDOCRINOL* 2014, **52**(1):R17-R33.

- 665 38. Heude E, Bellessort B, Fontaine A, Hamazaki M, Treier AC, Treier M, Levi G, Narboux-Neme N: **Etiology**  
666 **of craniofacial malformations in mouse models of blepharophimosis, ptosis and epicanthus inversus**  
667 **syndrome.** *HUM MOL GENET* 2015, **24**(6):1670-1681.
- 668 39. Wiener DJ, Wiedemar N, Welle MM, Drogemuller C: **Novel Features of the Prenatal Horn Bud**  
669 **Development in Cattle (*Bos taurus*).** *PLOS ONE* 2015, **10**(5):e127691.
- 670

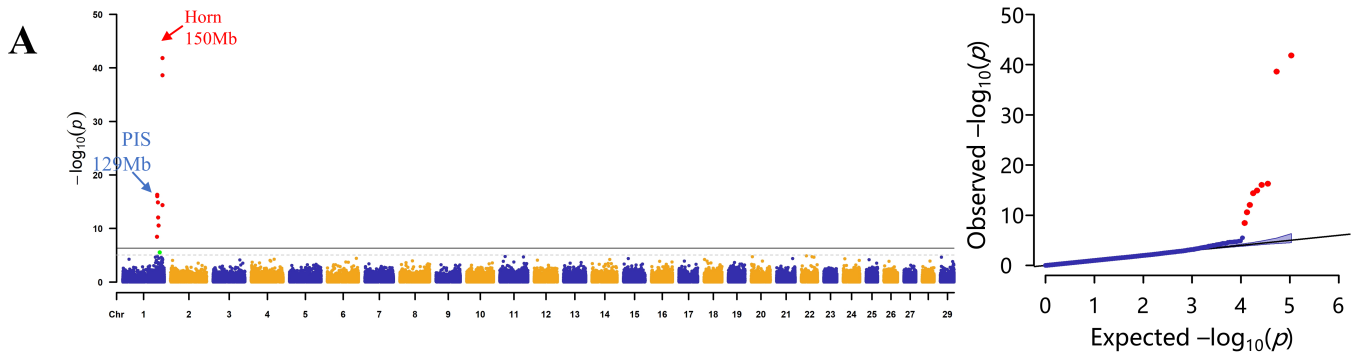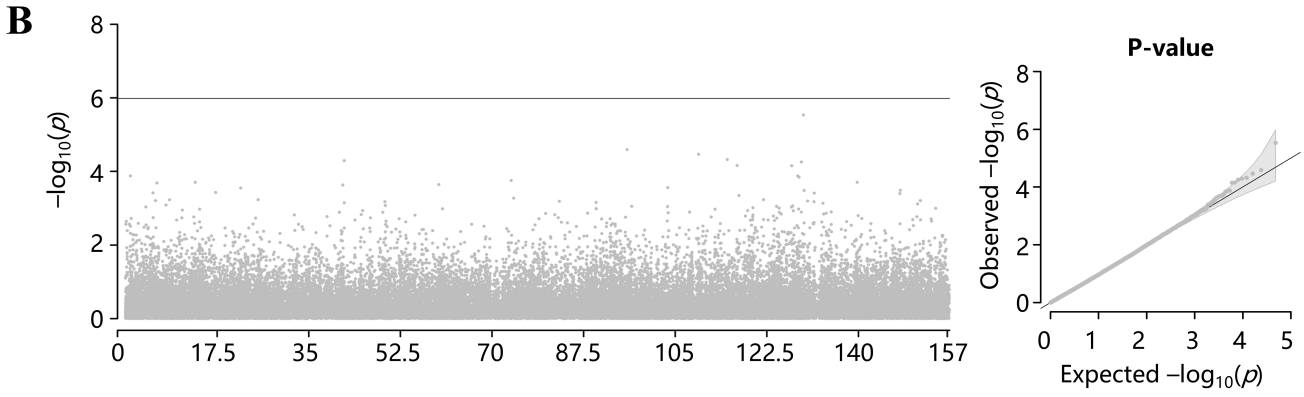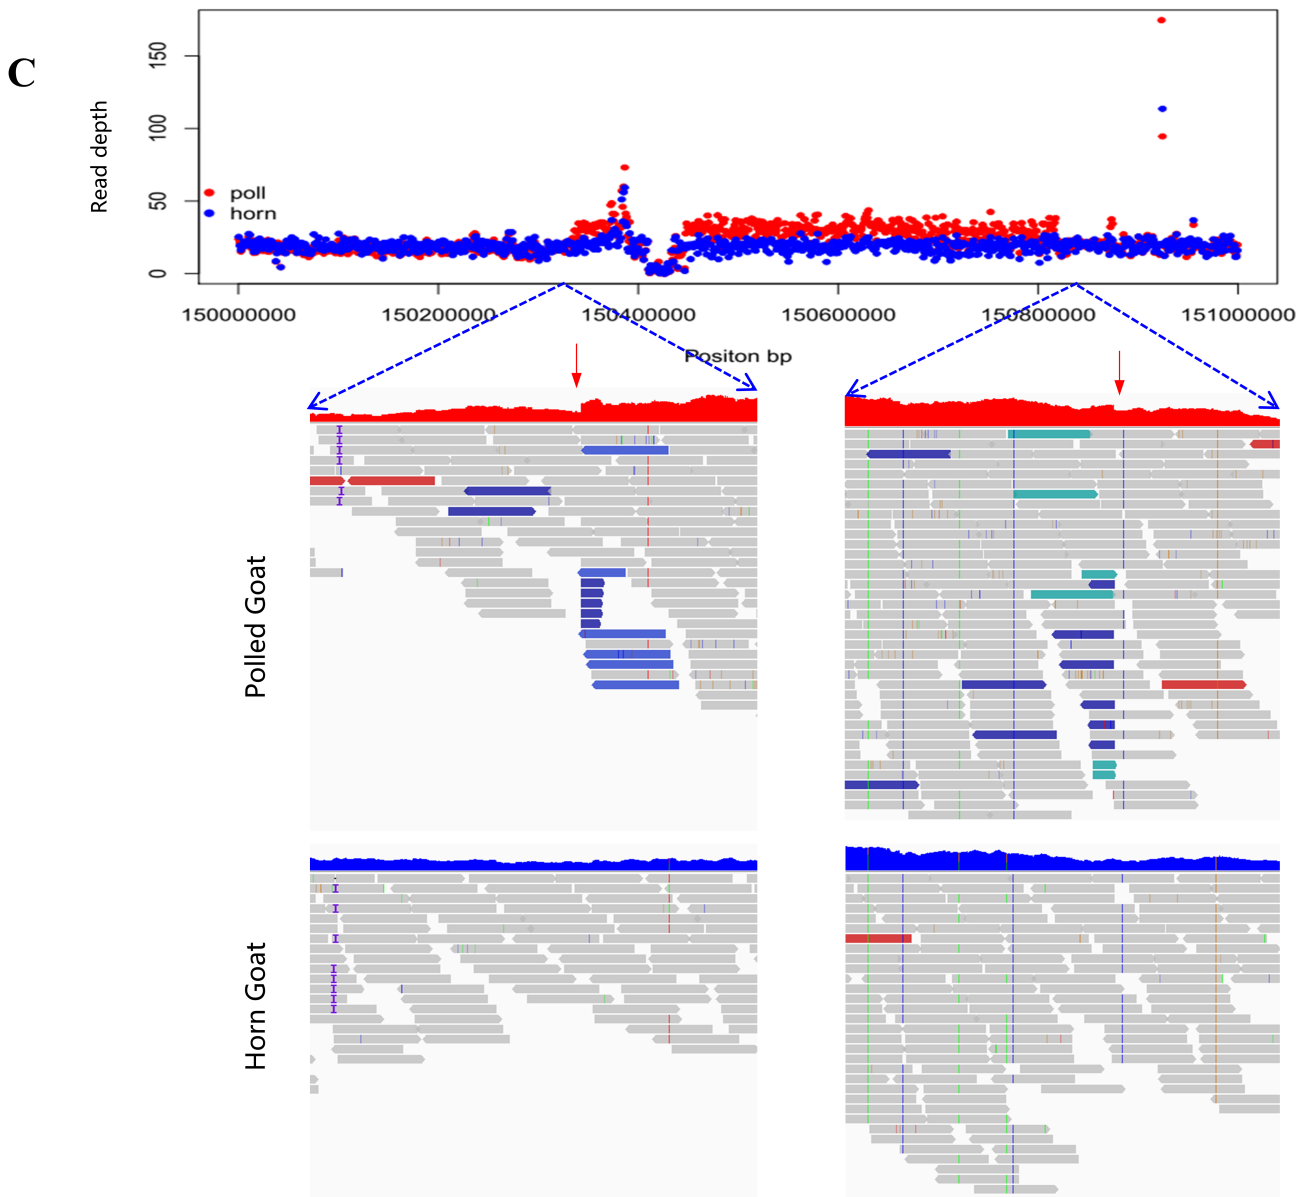

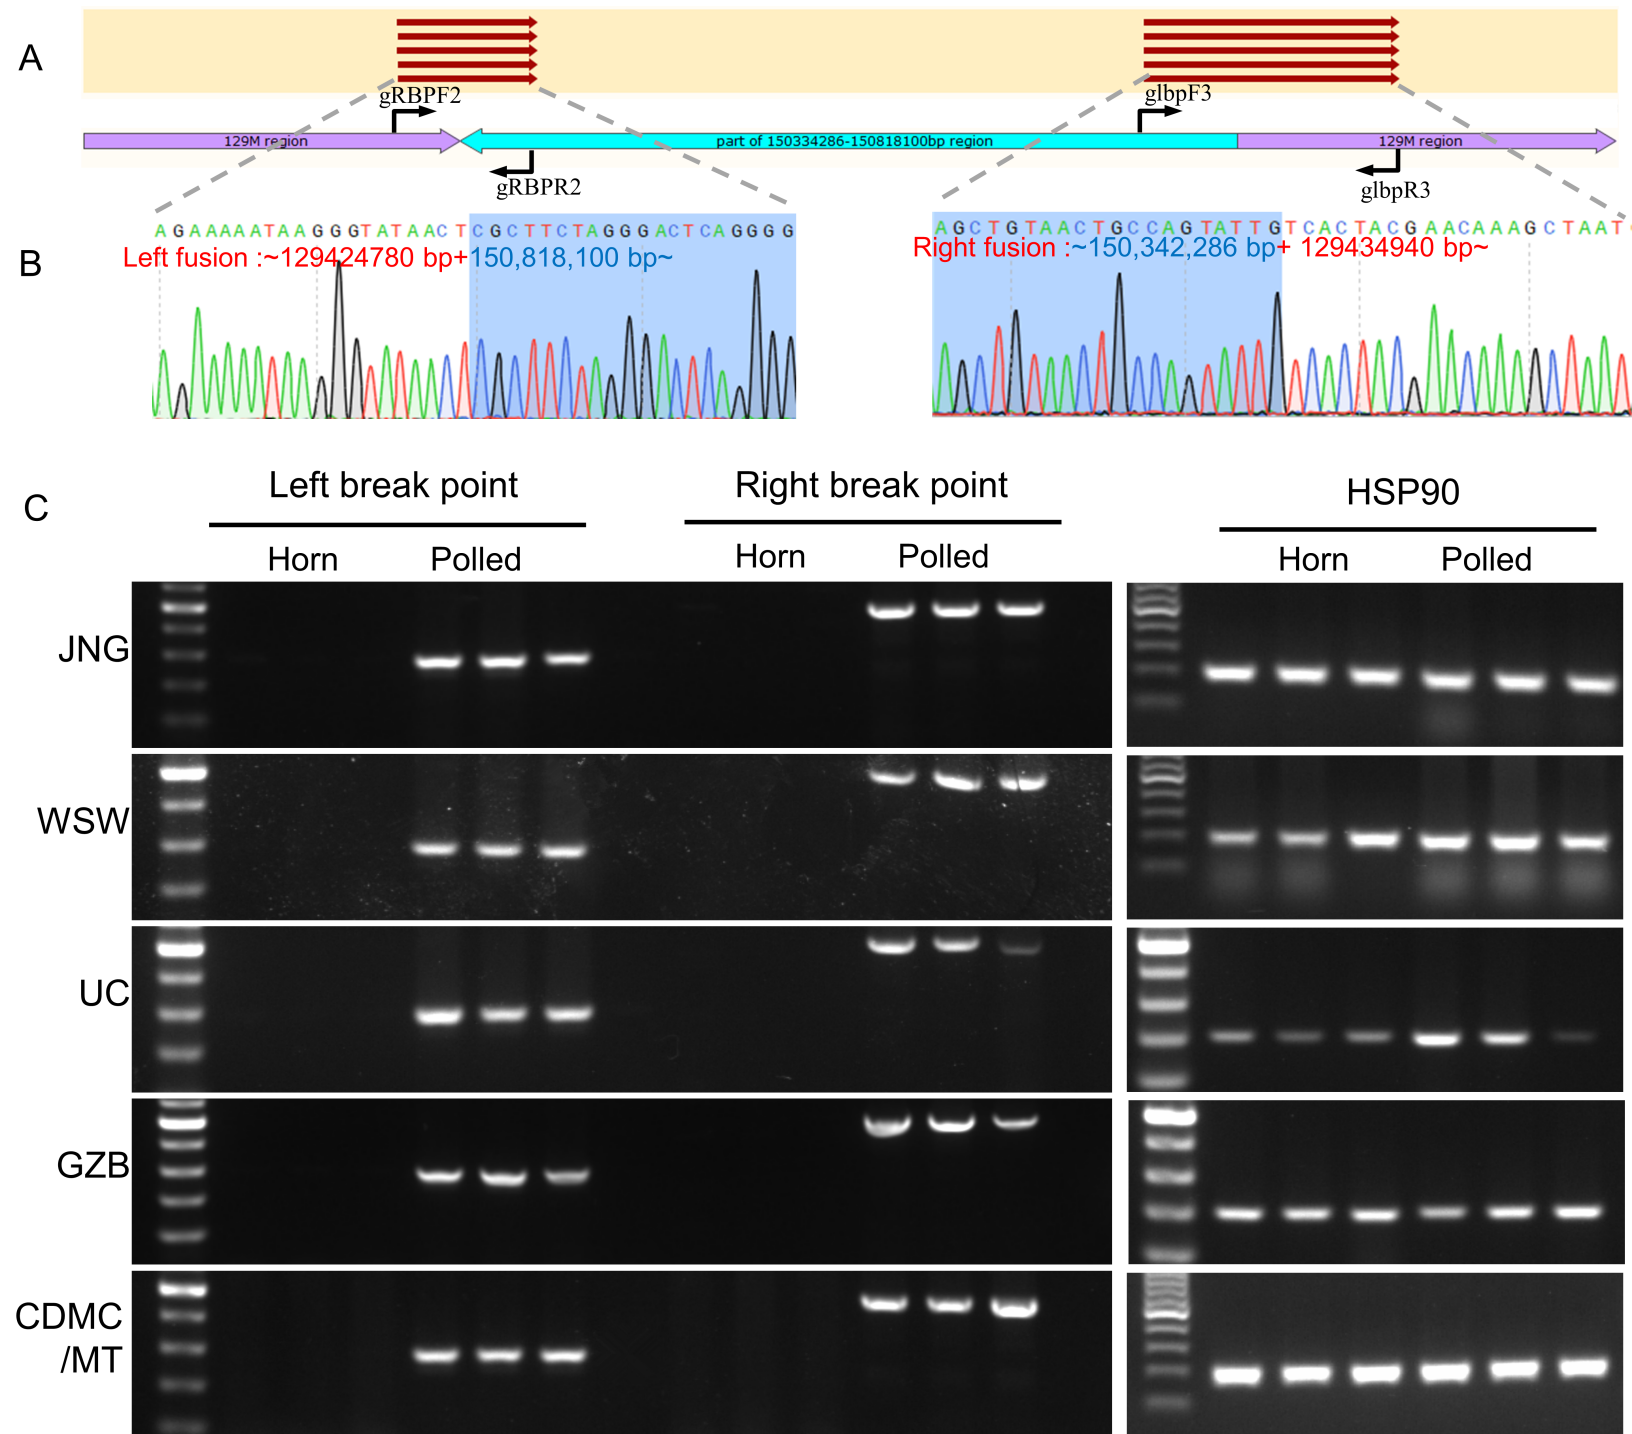



A Chr.1

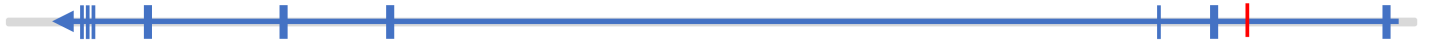

Horn-SINE

B

CCCAGATTAGTCTAATCAGTGCAAGCCTGTCTTTCAGTCCATTTAAAGATCCTTTGCACATTCAGCCT  
 GTCTCAGAATCAGCAAGTCCAGGGCCCATGGGTGGTCCCTGTCCCAGCCCTGCTGTTCCCTCTCCTCCTC  
 CCCCCTCTGCCTCTGCACTTCAGGACCGCAGCAGGAGCGCAGCATGGCCAGGGACTGTTGGAAGCCCT  
 CTCCCCAGGGCACTGTGCTTTGTAAGGCTCTCAGCACGGCAACAAGGAGATCCAACCAGTCCATCCTAA  
 AGATCAGTCCCTGGGTGCTCATTGGAAGGACTGATGCTGAAACTGAAACTCCAATACTTTGGTCACTCAT  
 GCAAAGAGCTGACTCATTGAAAAGACCCTGATGCTGGGAAAGATTGAAGGTAGGAGGAGAAGGGGA  
 CGACAGAGGATGAGATGGTTGGTGGCATCACTGACTCAATGGACATGAGTTTGAGCAAACCTCCGGGA  
 GTTGGTGATGGACAGGGAGGCCTGGCGTGCTGCAGTCCATGGGGTCGCAACGAATCAGACATGACTGA  
 GCGACTGAACTGAACTGAA

C

Sequence alignment of the Horn-SINE region across four species: Sheep, Yak, Cow, Siberian, and Goat. The alignment shows conserved regions and species-specific variations. The sequence is color-coded by nucleotide (A, C, G, T) and includes position markers on the right side of each line.

Conserved sequence: **G G A A G A A T T G A T G C T T T T N A A C T G T G G T G C T G - A G A A G A C T C T T G A G A G T C C C T - - - T G G A C T G C A A G G A G A T C C A A C**

Species-specific variations (indicated by symbols like ♀, ♂, ♀, ♂):

- Sheep: **GGGGCTGTTGGAAGCCCTCTCCCTAGGGGCACTG---**
- Yak: **AGAAAGAAATTGATGCTTTTGAACCTGTGGTGTG-AGAAGACTCTTGAGAGTCCCT---**
- Cow: **GAAAGAAATTGATGCTTTTGAACCTGTGGTGTGGAGAAGACTCTTGAGAGTCCCT---**
- Siberian: **AAAGAAATTGATGCTTTTGAACCTGTGGTGTGGAGAAGACTCTTGAGAGTCCCT---**
- Goat: **AGGGACTGTTGGAAGCCCTCTCCCTAGGGGCACTG---**

Other conserved regions include: **CAGTCCATCCTAAAGGAGATCAGTCCCTGTTTCATTGGAAGGACTGATGCTGAAAGCTGAAACTCCAATACTTTGGCCA** and **GGATGAGATGGTTGGTGGC TCCTGACTCAAIGGCATGAGTTTGAGTAAACTCCGGAGTTGGTGATGGACAGGGAG**.

Final conserved sequence: **TCT-ACATGGGNNANGNTGAAAGGTA NNNN**

Species-specific variations at the end of the sequence:

- Sheep: **TCTTCCATGGGGCAAGTTGAAAGGTTCC---**
- Yak: **TTT-AGGAGGGCAAGGAAAGGAGAGAA-**
- Cow: **TCT-ACATGTATTACAGTATCATGTAGTAG**
- Siberian: **---AGATTGATTAAGTAAACAGTTAAAT**
- Goat: **TCTTCCGTGGGGCAAGTTGAAAGGTTCTCA**

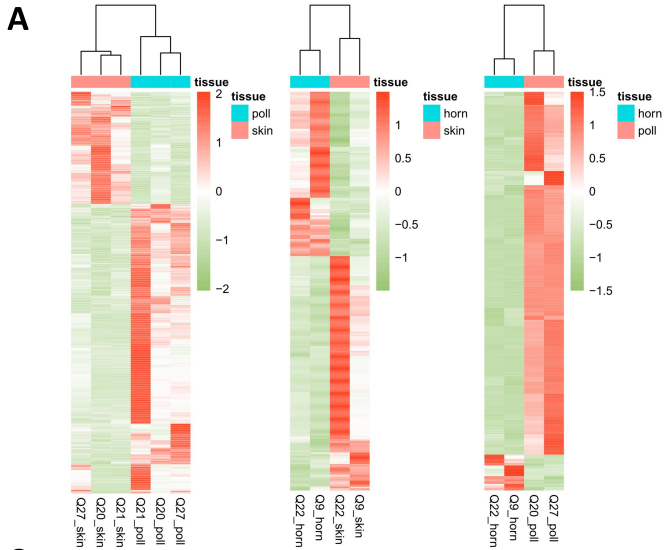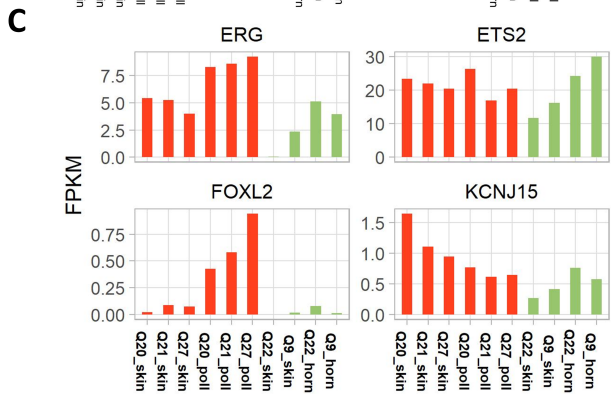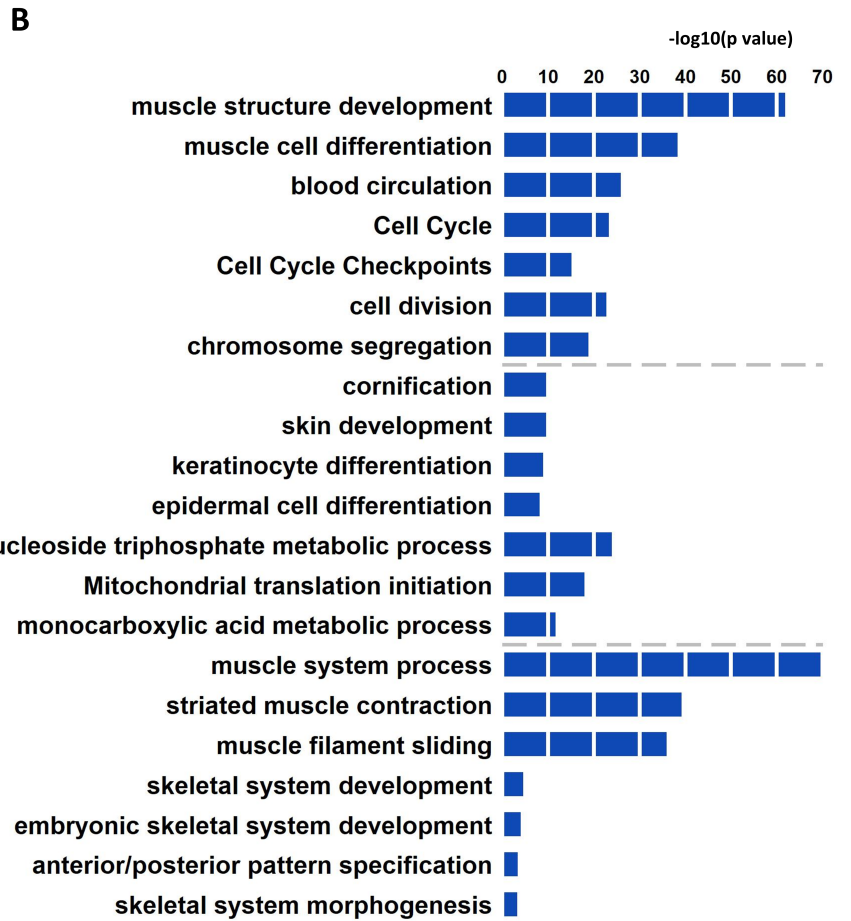

**Polled allele:** A fusion topological associating domain → In horn bud: Foxl2 ↑, ERG ↑ → Muscle development ↑, Skeletal development ↓ → Inhibition of horn development

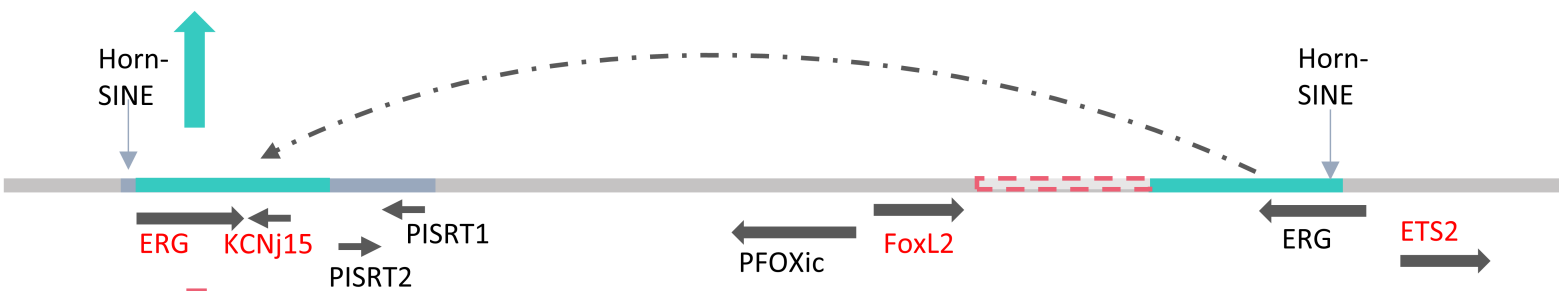

**Horn allele:** The FOXL2 topological associating domain → In horn bud: ERG expressed normal, Foxl2 absent → Skin development ↑, Cornification ↑, Blood vessel ↑ → Horn development

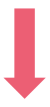

Source: https://www.biorxiv.org/content/10.1101/2021.12.20.473573v1.full.pdf
